# Supplementary material
Source: PubMed Central journal article supplement (PMC4512539)
Supplement: supp_115.176107_FigureS1.pdf [file supp_115.176107_FigureS1.pdf]

# of causal SNPs = 1

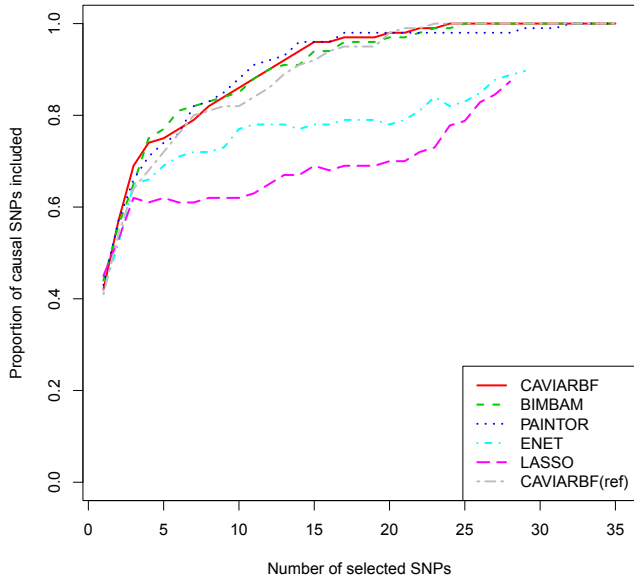

# of causal SNPs = 2

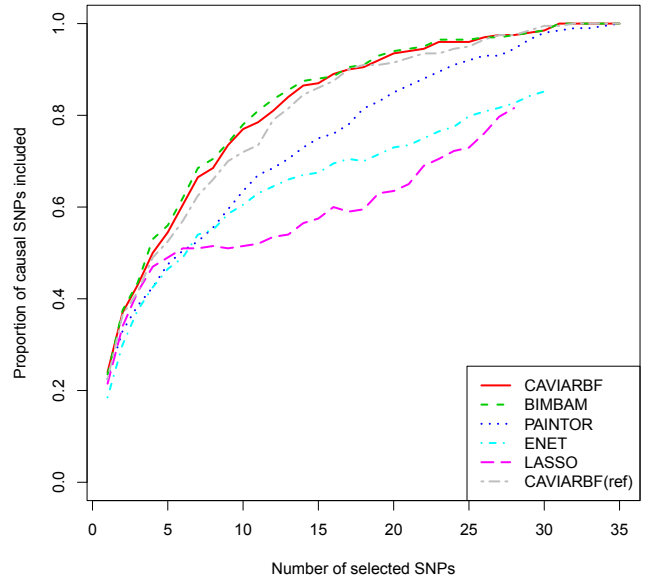

# of causal SNPs = 3

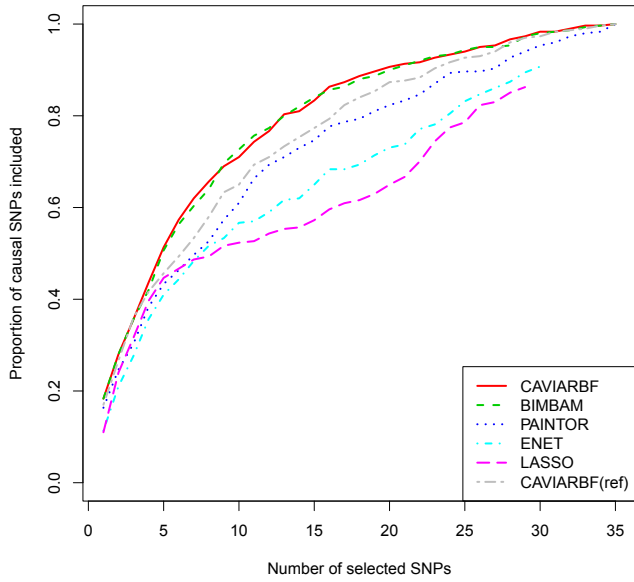

# of causal SNPs = 4

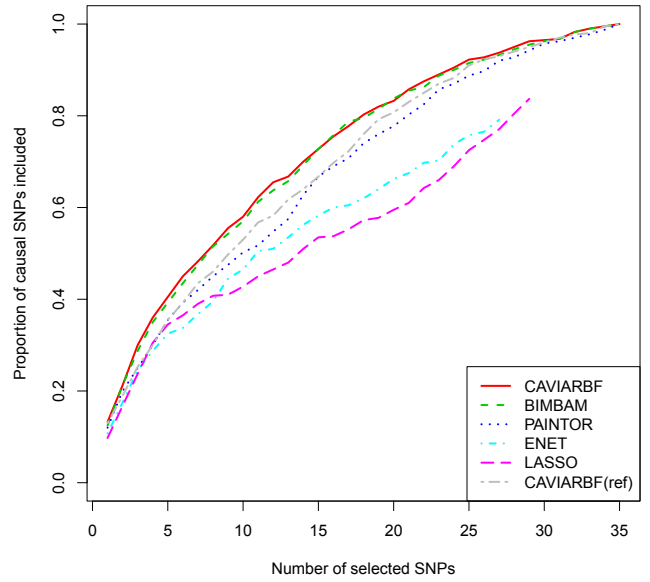

# of causal SNPs = 5

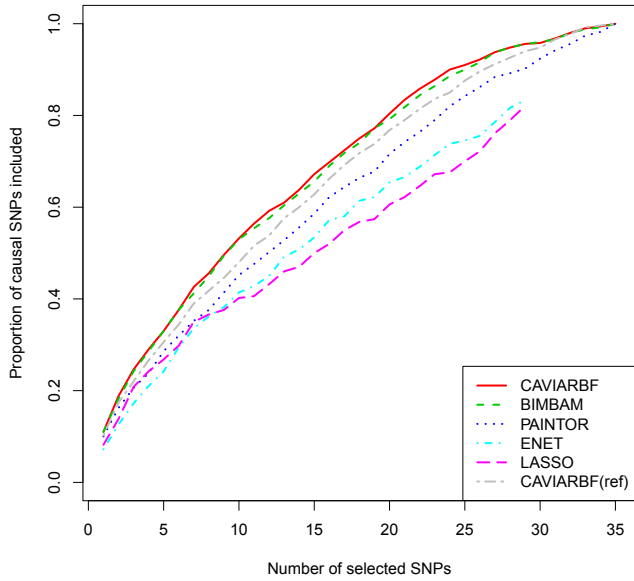

Figure S1. Comparison of different fine mapping methods on binary traits. The y-axis is the proportion of causal SNPs included and x-axis is the number of selected SNPs. There are 35 SNPs in total. The proportions are calculated over 100 data sets. The proportion (y-value) is not calculated if more than 5 data sets do not reach the specified number of SNPs (x-value). This is why some proportions are not available for LASSO and ENET as the number of selected candidate SNPs becomes large. Each plot corresponds to a different number of causal SNPs.
