# Supplementary material
Source: PubMed Central journal article supplement (PMC4512539)
Supplement: supp_115.176107_FigureS2.pdf [file supp_115.176107_FigureS2.pdf]

# of causal SNPs = 1

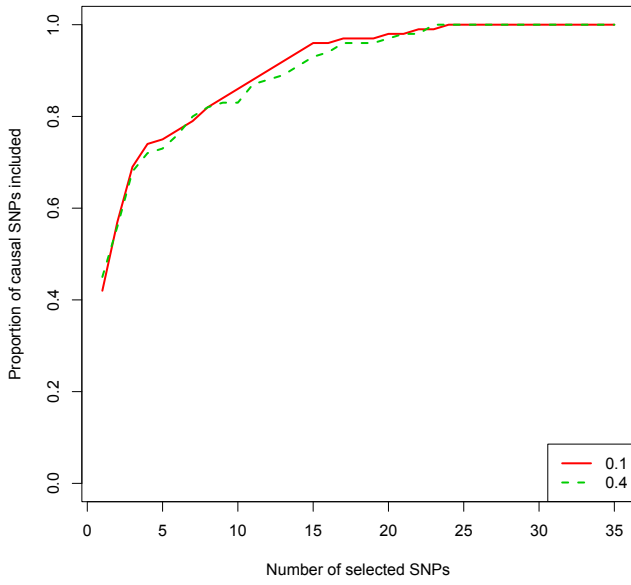

# of causal SNPs = 2

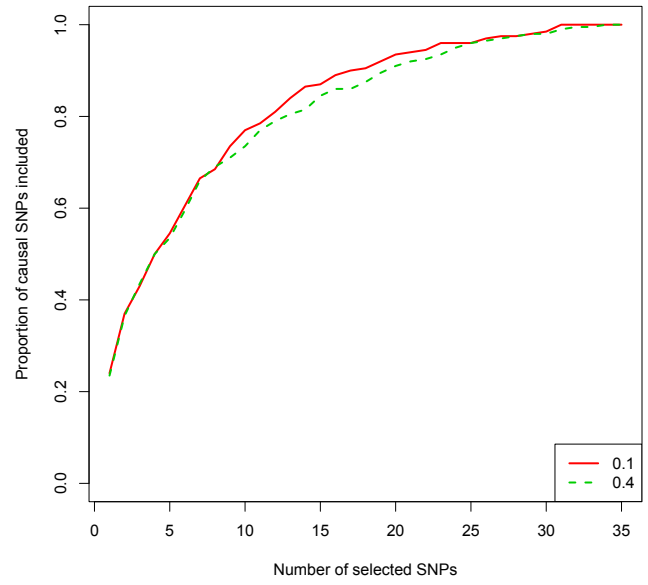

# of causal SNPs = 3

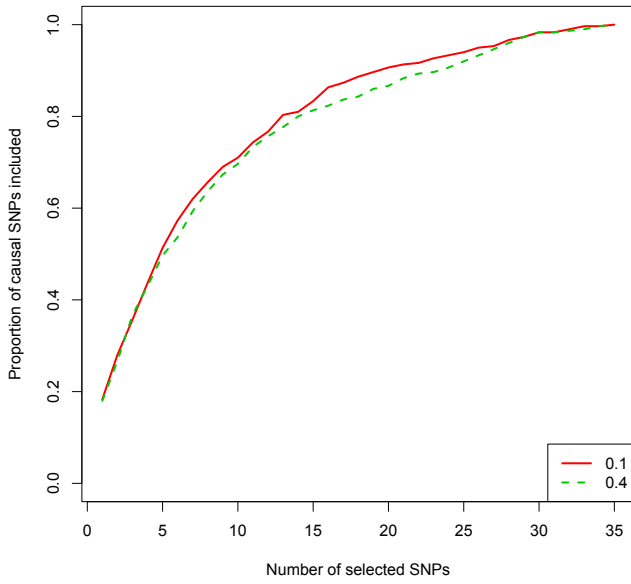

# of causal SNPs = 4

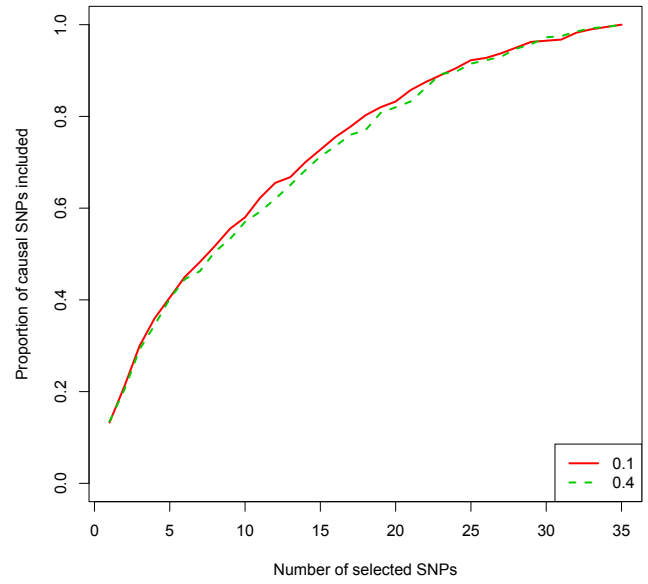

# of causal SNPs = 5

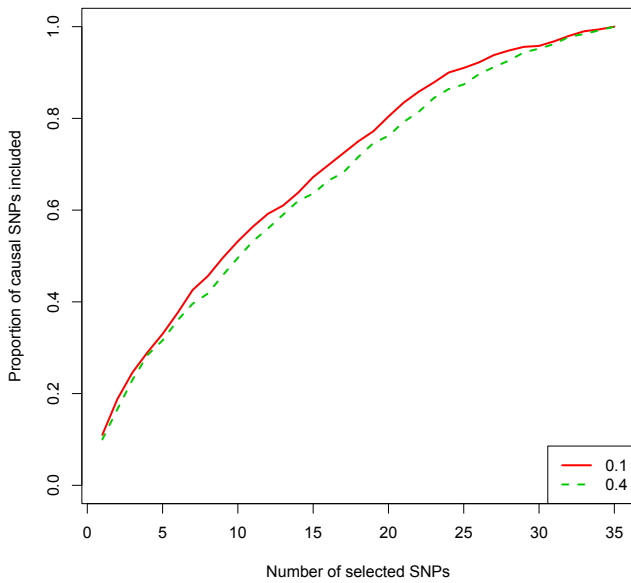

Figure S2. Comparison of different prior values  $\sigma_a$  on binary traits. CAVIARBF is used to calculate the Bayes factors. The meaning of the x-axis and y-axis is the same as in Figure S1.
