# Supplementary material
Source: PubMed Central journal article supplement (PMC4512539)
Supplement: supp_115.176107_FigureS3.pdf [file supp_115.176107_FigureS3.pdf]

# of causal SNPs = 1

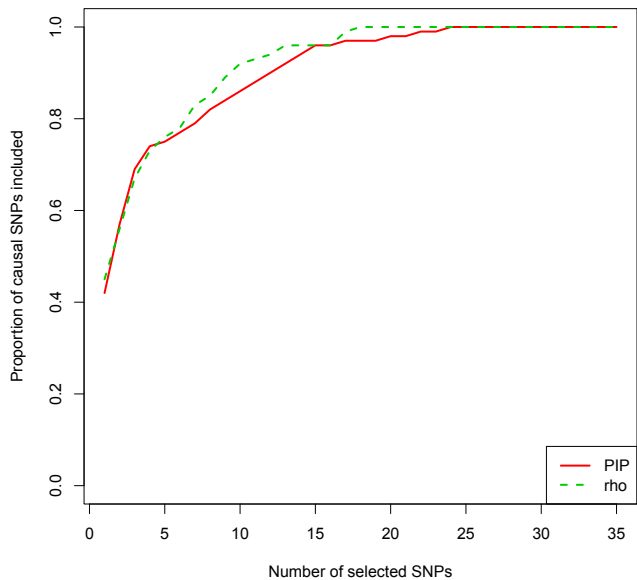

# of causal SNPs = 2

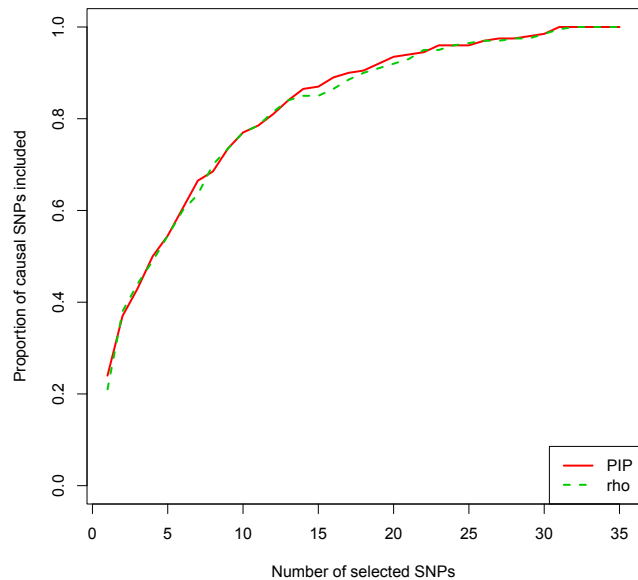

# of causal SNPs = 3

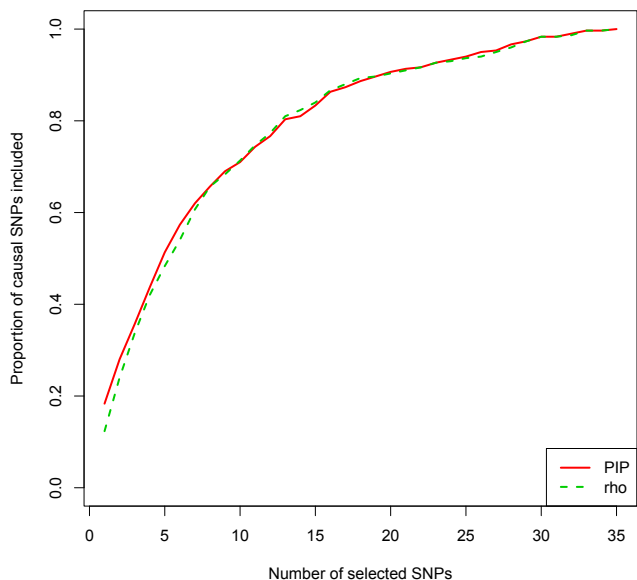

# of causal SNPs = 4

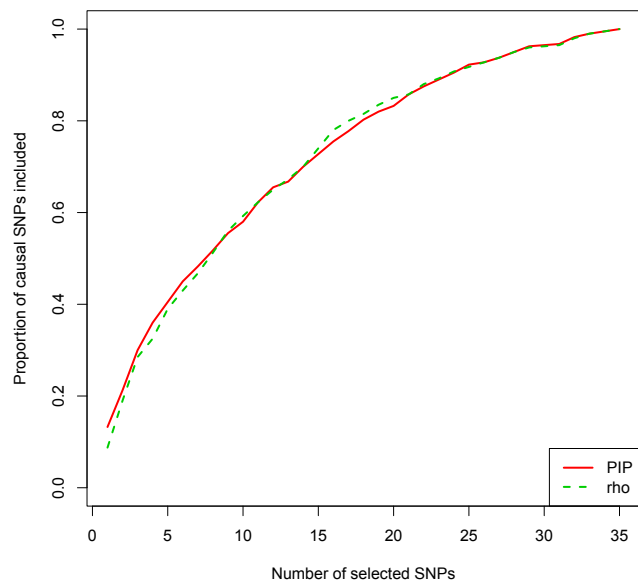

# of causal SNPs = 5

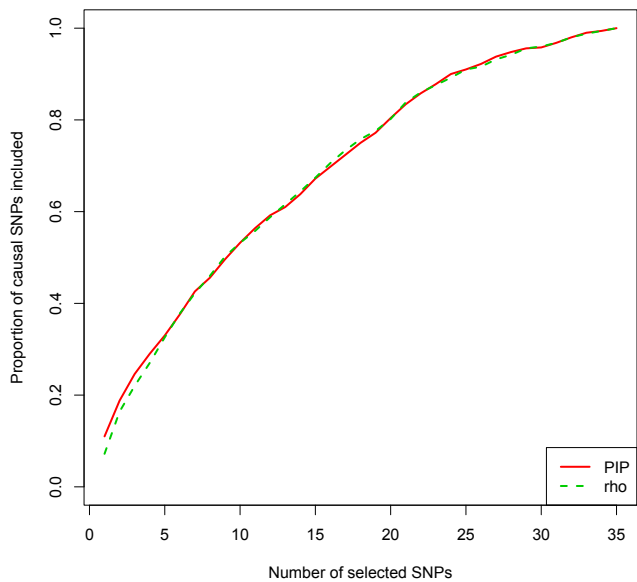

Figure S3. Comparison of different criteria to prioritize variants on binary traits. CAVIARBF is used to calculate the Bayes factors. The green dash line represents prioritizing SNPs using marginal posterior inclusion probabilities (PIPs). The red solid line represents prioritizing SNPs using  $\rho$ -level confidence set. The meaning of the x-axis and y-axis is the same as in Figure S1.
