# Supplementary material
Source: PubMed Central journal article supplement (PMC4512539)
Supplement: supp_115.176107_FigureS5.pdf [file supp_115.176107_FigureS5.pdf]

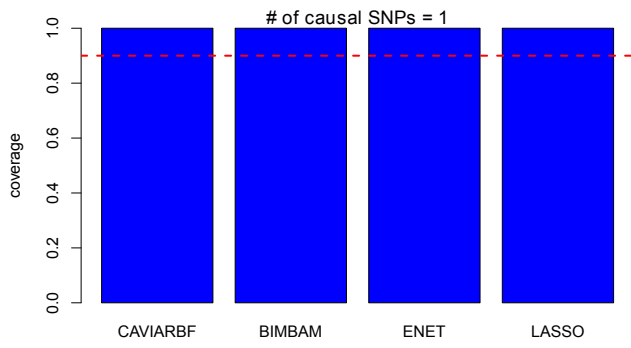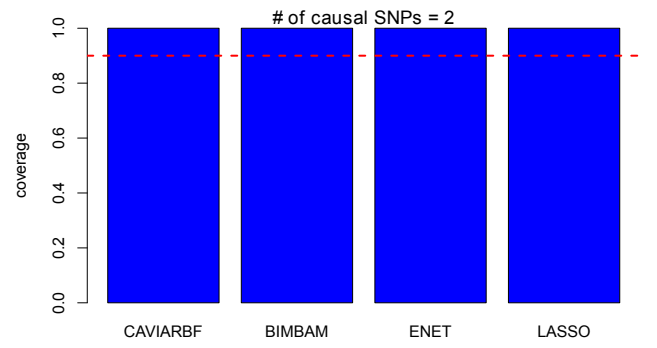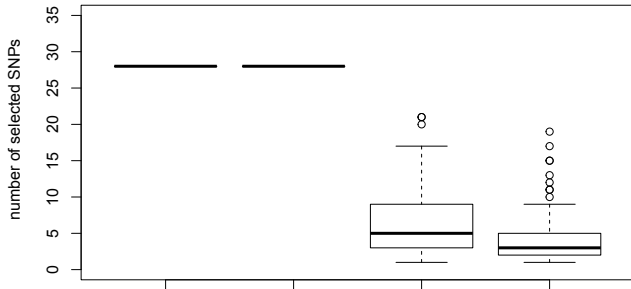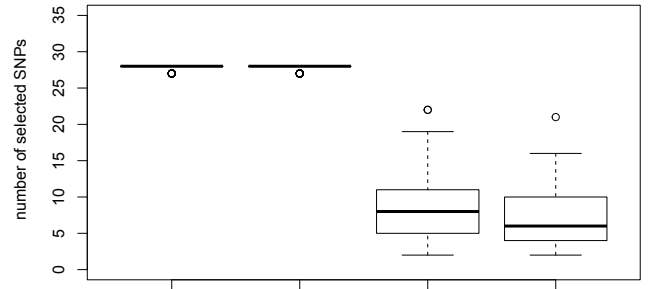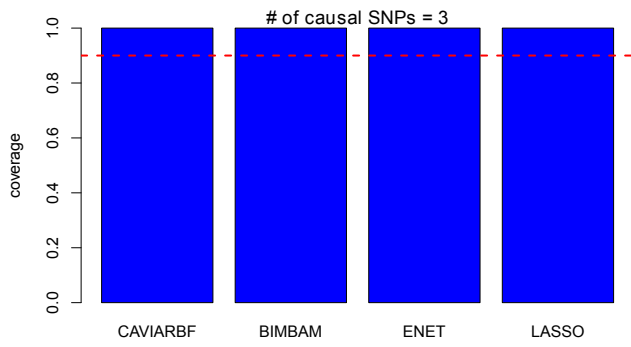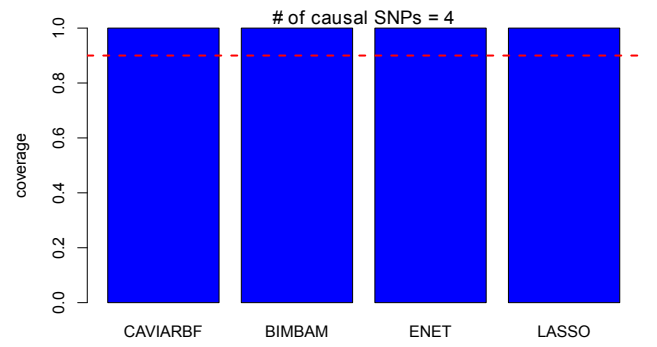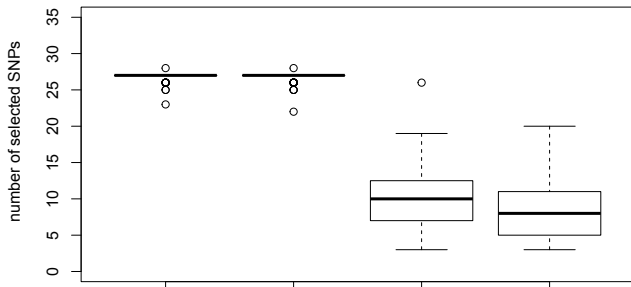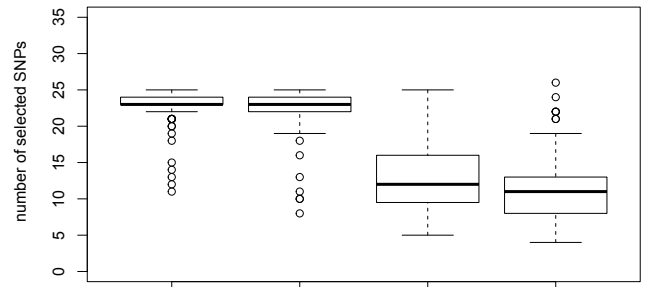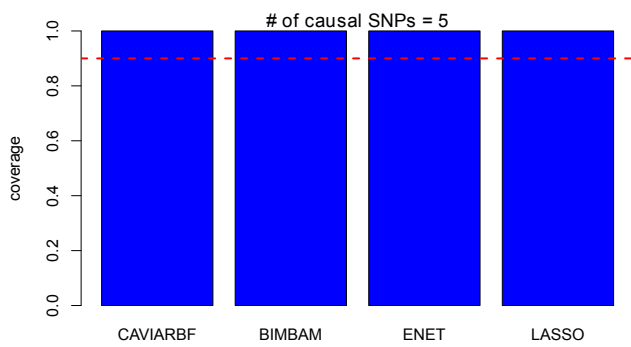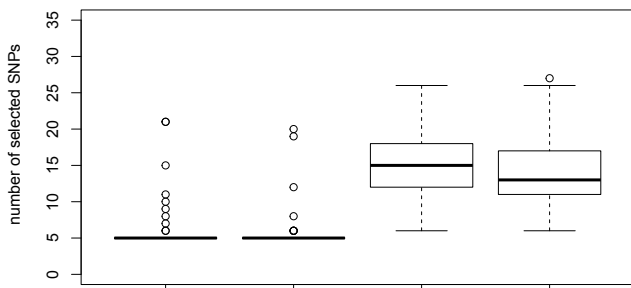

Figure S5. Estimated probabilities of  $\rho$ -level confidence set and boxplots of the number of selected SNPs for independent SNPs. The phenotypes are quantitative traits. The rest of the description is the same as Figure S4.
