# Supplementary material
Source: PubMed Central journal article supplement (PMC4512539)
Supplement: supp_115.176107_FigureS6.pdf [file supp_115.176107_FigureS6.pdf]

Pairwise LD, P values and marginal posterior inclusion probabilities (PIPs)

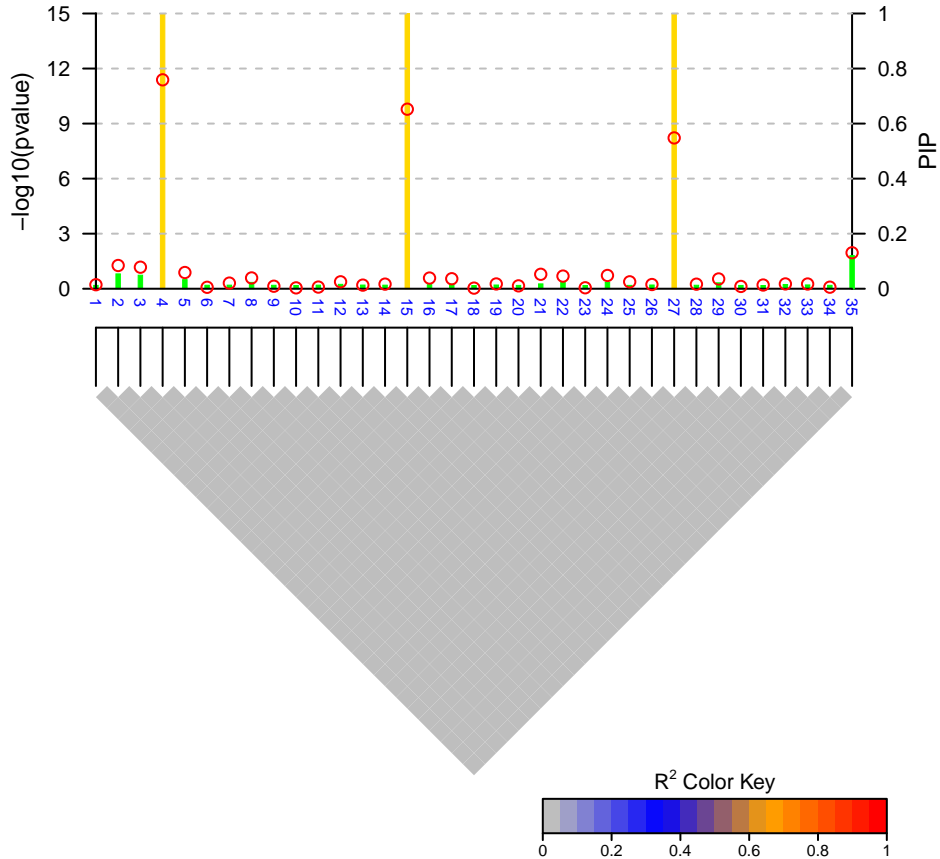

Figure S6. P-values and posterior inclusion probabilities (PIPs) for independent SNPs. Circles represent the p-values on the left y-axis and lines represent the PIPs on the right y-axis. The gold color indicates the true causal SNPs. The color coded LD pattern is shown below.
