# Supplementary material
Source: PubMed Central journal article supplement (PMC4512539)
Supplement: supp_115.176107_FigureS8.pdf [file supp_115.176107_FigureS8.pdf]

Pairwise LD, P values and marginal posterior inclusion probabilities (PIPs)

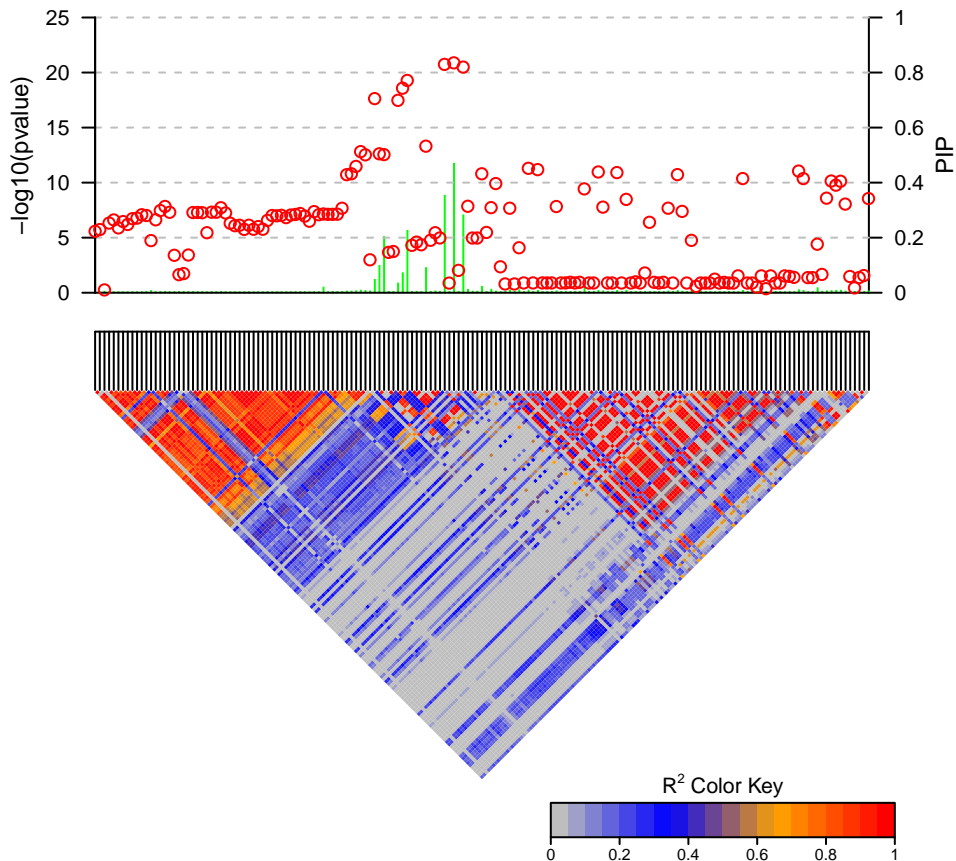

Figure S8. P-values and posterior inclusion probabilities (PIPs) from BIMBAM on U.S. cohort. Circles represent the individual-SNP-based p-values on the left y-axis and lines represent the PIPs on the right y-axis. The color coded LD pattern is shown below.
