# Supplementary material
Source: PubMed Central journal article supplement (PMC4512539)
Supplement: supp_115.176107_FigureS11.pdf [file supp_115.176107_FigureS11.pdf]

Pairwise LD, P values and marginal posterior inclusion probabilities (PIPs)

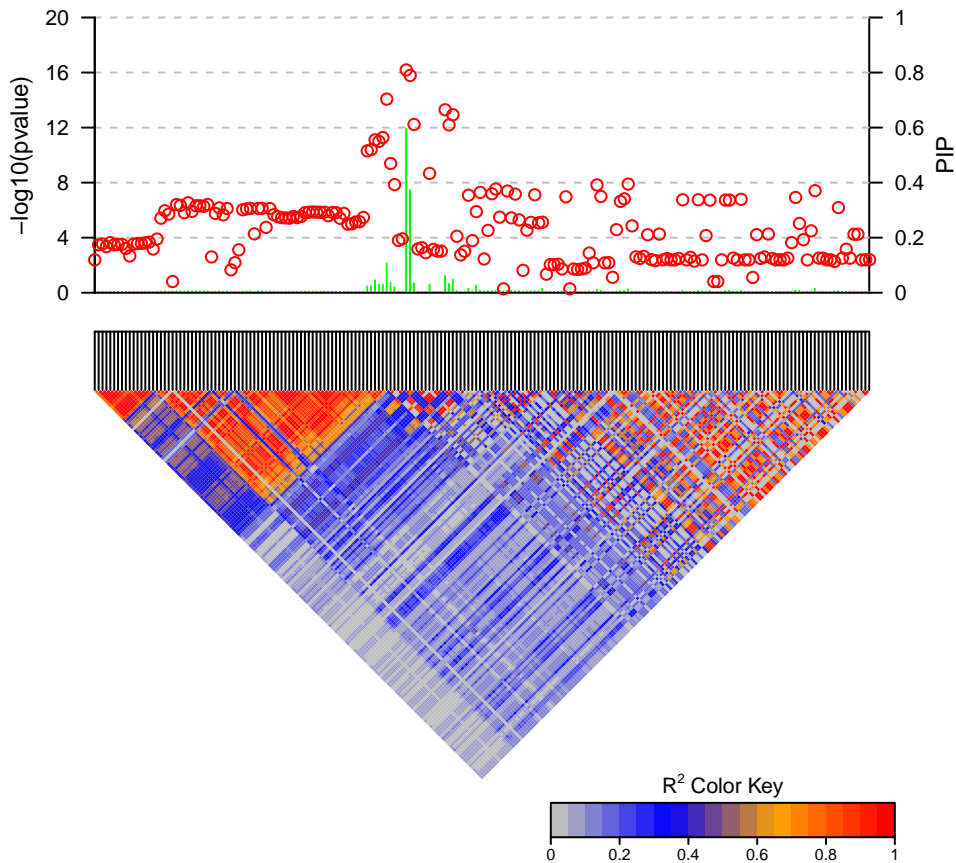

Figure S11. P-values and posterior inclusion probabilities (PIPs) from BIMBAM on San Diego cohort. The rest of the description is the same as Figure S8.
