# Supplementary material
Source: PubMed Central journal article supplement (PMC4512539)
Supplement: supp_115.176107_FigureS13.pdf [file supp_115.176107_FigureS13.pdf]

Pairwise LD, P values and marginal posterior inclusion probabilities (PIPs)

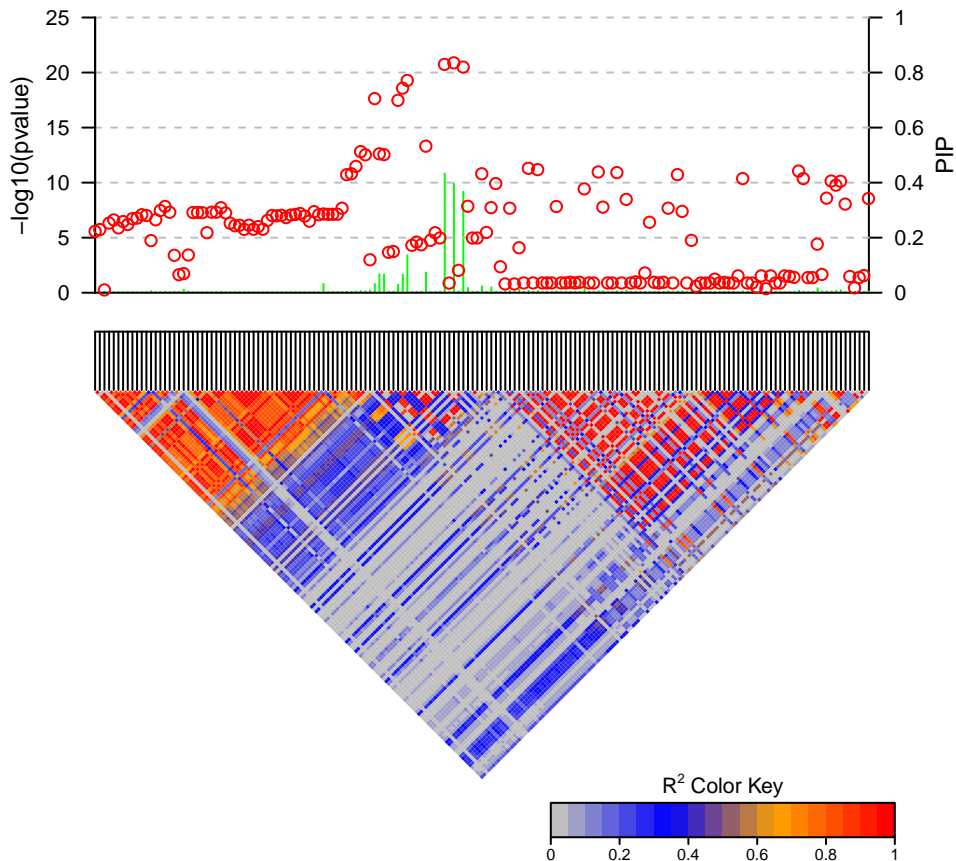

Figure S13. P-values and posterior inclusion probabilities (PIPs) from CAVIARBF on U.S. cohort using estimated correlation matrix from EUR population in the 1000 Genomes Project. The rest of the description is the same as Figure S8.
