# Supplementary material
Source: PubMed Central journal article supplement (PMC4512539)
Supplement: supp_115.176107_TableS1.pdf [file supp_115.176107_TableS1.pdf]

Table S1. Average number of SNPs needed to include 50% and 90% causal SNPs among 100 simulated data sets under different number of causal SNPs for binary trait.

|               | 1 <sup>a</sup> |              | 2           |              | 3           |              | 4           |              | 5           |              |
|---------------|----------------|--------------|-------------|--------------|-------------|--------------|-------------|--------------|-------------|--------------|
|               | 50%            | 90%          | 50%         | 90%          | 50%         | 90%          | 50%         | 90%          | 50%         | 90%          |
| CAVIARBF      | 1.53           | 12.00        | 4.00        | 17.00        | <b>4.83</b> | <b>19.33</b> | <b>7.50</b> | <b>23.67</b> | <b>9.11</b> | <b>24.00</b> |
| BIMBAM        | <b>1.50</b>    | 12.00        | <b>3.68</b> | <b>16.75</b> | 4.92        | 20.00        | 7.63        | 24.00        | 9.16        | 25.00        |
| PAINTOR       | <b>1.50</b>    | <b>10.67</b> | 5.83        | 23.33        | 7.11        | 26.50        | 9.91        | 26.11        | 11.92       | 28.80        |
| ENET          | 1.80           | NA           | 6.20        | NA           | 7.50        | 29.43        | 10.88       | NA           | 13.50       | NA           |
| LASSO         | 1.63           | NA           | 5.50        | NA           | 8.29        | NA           | 13.67       | NA           | 15.00       | NA           |
| CAVIARBF(ref) | 1.70           | 13.50        | 4.29        | 17.00        | 6.17        | 22.83        | 9.08        | 24.64        | 10.56       | 26.25        |

<sup>a</sup>The number of causal SNPs in the data. The smallest number for each column is in bold. NA: data not available for the calculation. CAVIARBF(ref): CAVIARBF with the correlation among SNPs estimated from the CEU population of the 1000 Genomes Project.
